# Supplementary material for: Rheology and thermal stability of pH-dependent hydrogels of N-acyl-l-carnosine amphiphiles: effect of the alkoxy tail length
Source: Royal Society of Chemistry journal article supplement (doi:10.1039/c1sm06209c), 2011-01-01
Supplement: c1sm06209c.pdf [file c1sm06209c.pdf]

## Rheology and thermal stability of pH-dependent hydrogels of *N*-acyl-L-carnosine amphiphiles: effect of alkoxy tail length<sup>†</sup>

Amrita Pal and Joykrishna Dey\*

### Supporting Information

**Table S1.** MGC (mg/mL) values of the gelators in aqueous buffers (20 mM) of different pH at 298 K.

| Gelator                   | Molar Mass<br>(g/mole) | MGC (mg/mL) |        |        |        |        |         |         |
|---------------------------|------------------------|-------------|--------|--------|--------|--------|---------|---------|
|                           |                        | pH = 1      | pH = 2 | pH = 7 | pH = 8 | pH = 9 | pH = 10 | pH = 11 |
| <b>C<sub>6</sub>OBC</b> * | 430                    | -           | 9.82   | 8.74   | 9.94   | 14.20  | 15.60   | -       |
| <b>C<sub>8</sub>OBC</b>   | 458                    | -           | 8.00   | 5.20   | 5.50   | 5.80   | 6.20    | -       |
| <b>C<sub>10</sub>OBC</b>  | 474                    | -           | 7.30   | 5.0    | 5.25   | 5.40   | 6.15    | -       |
| <b>C<sub>12</sub>OBC</b>  | 486                    | -           | 7.00   | 4.80   | 5.10   | 5.50   | 5.98    | 6.90    |
| <b>C<sub>14</sub>OBC</b>  | 514                    | 6.52        | 5.53   | 3.38   | 4.80   | 5.47   | 6.06    | 6.80    |
| <b>C<sub>16</sub>OBC</b>  | 570                    | 6.16        | 4.98   | 2.97   | 3.02   | 3.31   | 3.40    | 5.94    |

\* data represent MGC values at 288 K.

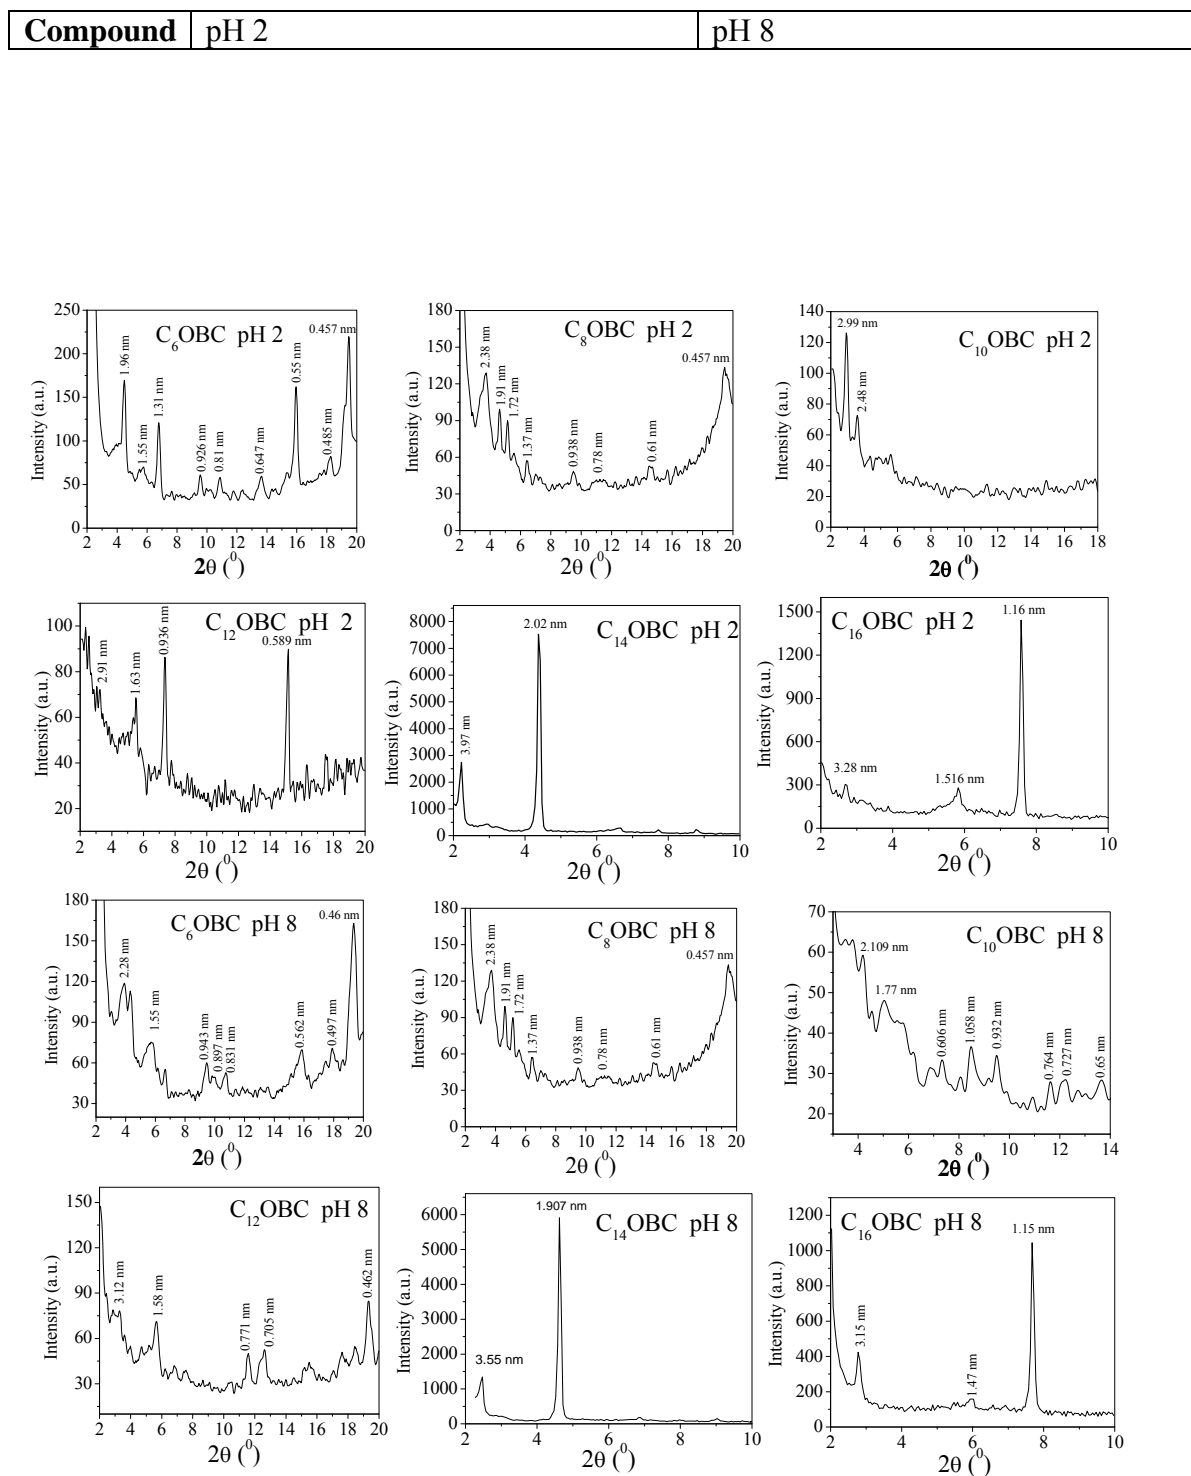

**Figure S1.** XRD of the air dried  $C_n$ OBC gels in 20 mM phosphate buffer of pH 2 and pH 8.

|                     | 2 $\theta$ | hkl | d (2l)/nm   | 2 $\theta$ | hkl | d /nm |
|---------------------|------------|-----|-------------|------------|-----|-------|
| C <sub>6</sub> OBC  | 4.50       | 001 | 1.96 (3.04) | 3.9        | 001 | 2.28  |
|                     | 9.54       | 002 | 0.93        | 9.91       | 002 | 0.90  |
|                     | 13.66      | 003 | 0.65        | 10.69      | 003 | 0.83  |
| C <sub>8</sub> OBC  | 3.73       | 001 | 2.38 (3.54) | 4.05       | 001 | 2.19  |
|                     | 6.48       | 002 | 1.37        | 9.67       | 002 | 0.91  |
|                     | 11.29      | 003 | 0.78        | 14.51      | 003 | 0.61  |
| C <sub>10</sub> OBC | 2.97       |     | 2.99 (4.10) | 4.21       | 001 | 2.11  |
|                     | 3.58       |     | 2.48        | 8.4        | 002 | 1.06  |
|                     |            |     |             | 12.23      | 003 | 0.73  |
| C <sub>12</sub> OBC | 3.05       | 001 | 2.91 (4.54) | 2.85       | 001 | 3.12  |
|                     | 5.45       | 002 | 1.64        | 5.60       | 002 | 1.59  |
|                     | 9.49       | 003 | 0.94        |            |     |       |
| C <sub>14</sub> OBC | 2.22       | 001 | 3.97 (5.04) | 2.48       | 001 | 3.55  |
|                     | 4.37       | 002 | 2.02        | 4.63       | 002 | 1.91  |
|                     | 6.64       | 003 | 1.33        | 6.87       | 003 | 1.28  |
| C <sub>16</sub> OBC | 2.69       | 001 | 3.28 (5.56) | 2.80       | 001 | 3.15  |
|                     | 5.82       | 002 | 1.52        | 6.00       | 002 | 1.47  |
|                     | 7.57       | 003 | 1.16        | 7.67       | 003 | 1.15  |

**Table S2.** 2 $\theta$  values and the corresponding interlayer distance of the hydrogels of C<sub>n</sub>OBC gelators in 20 mM phosphate buffer of pH 2 and 8.

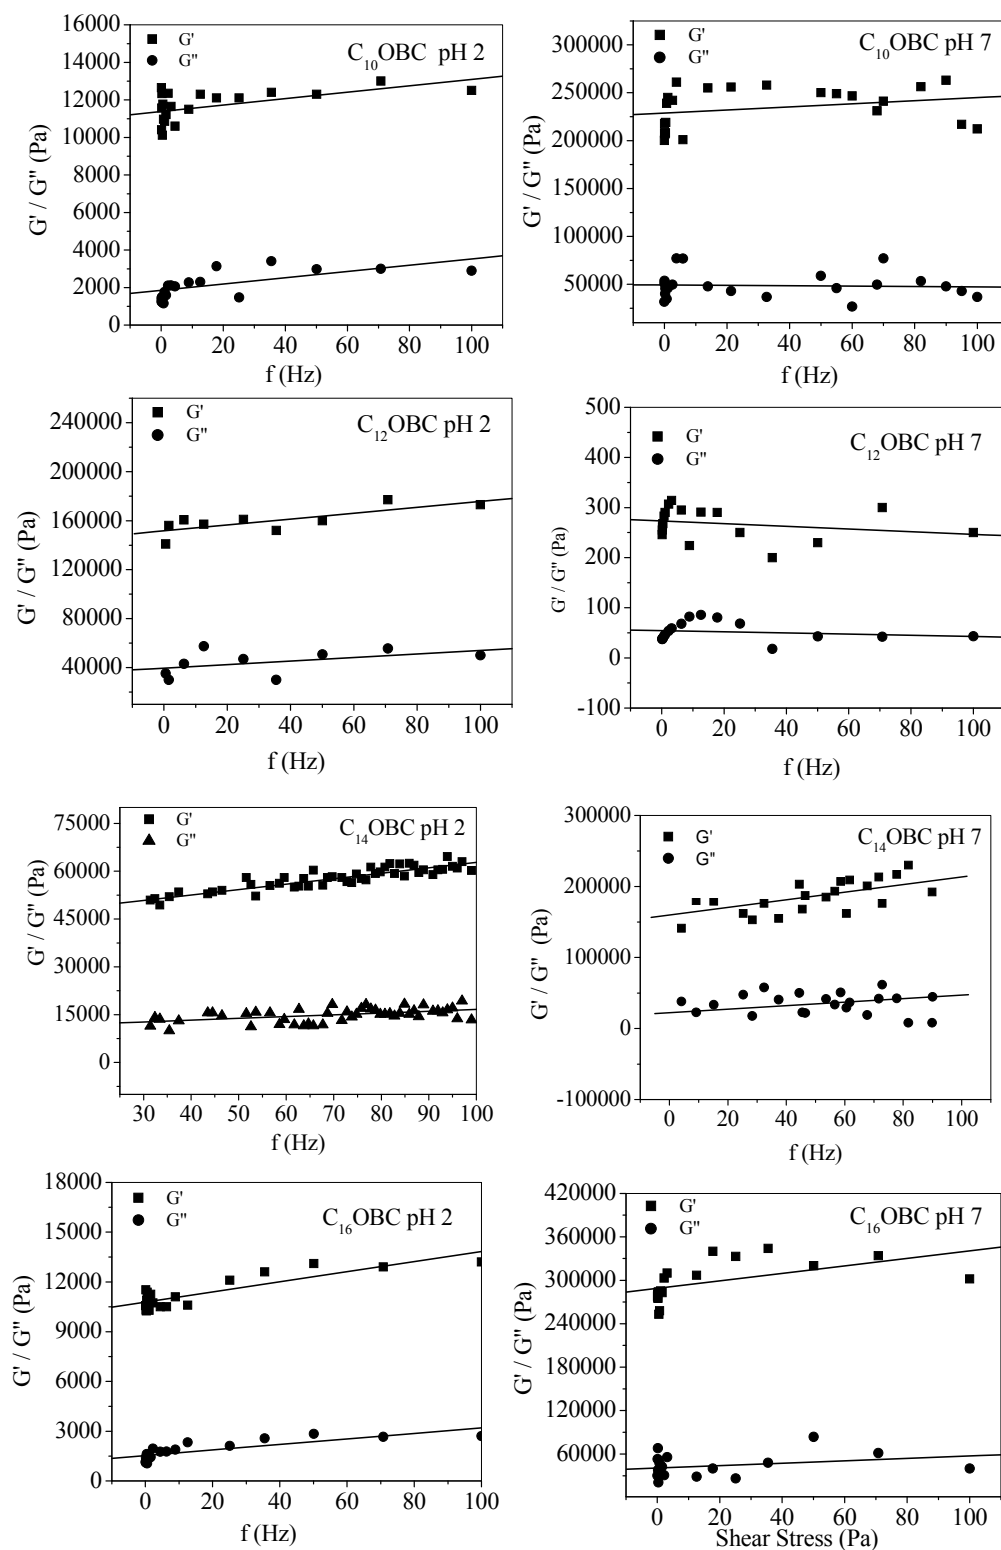

**Figure S2.** Plot of  $G' / G''$  Vs frequency of  $C_n$ OBC gels in 20 mM phosphate buffer of pH 2 and pH 7

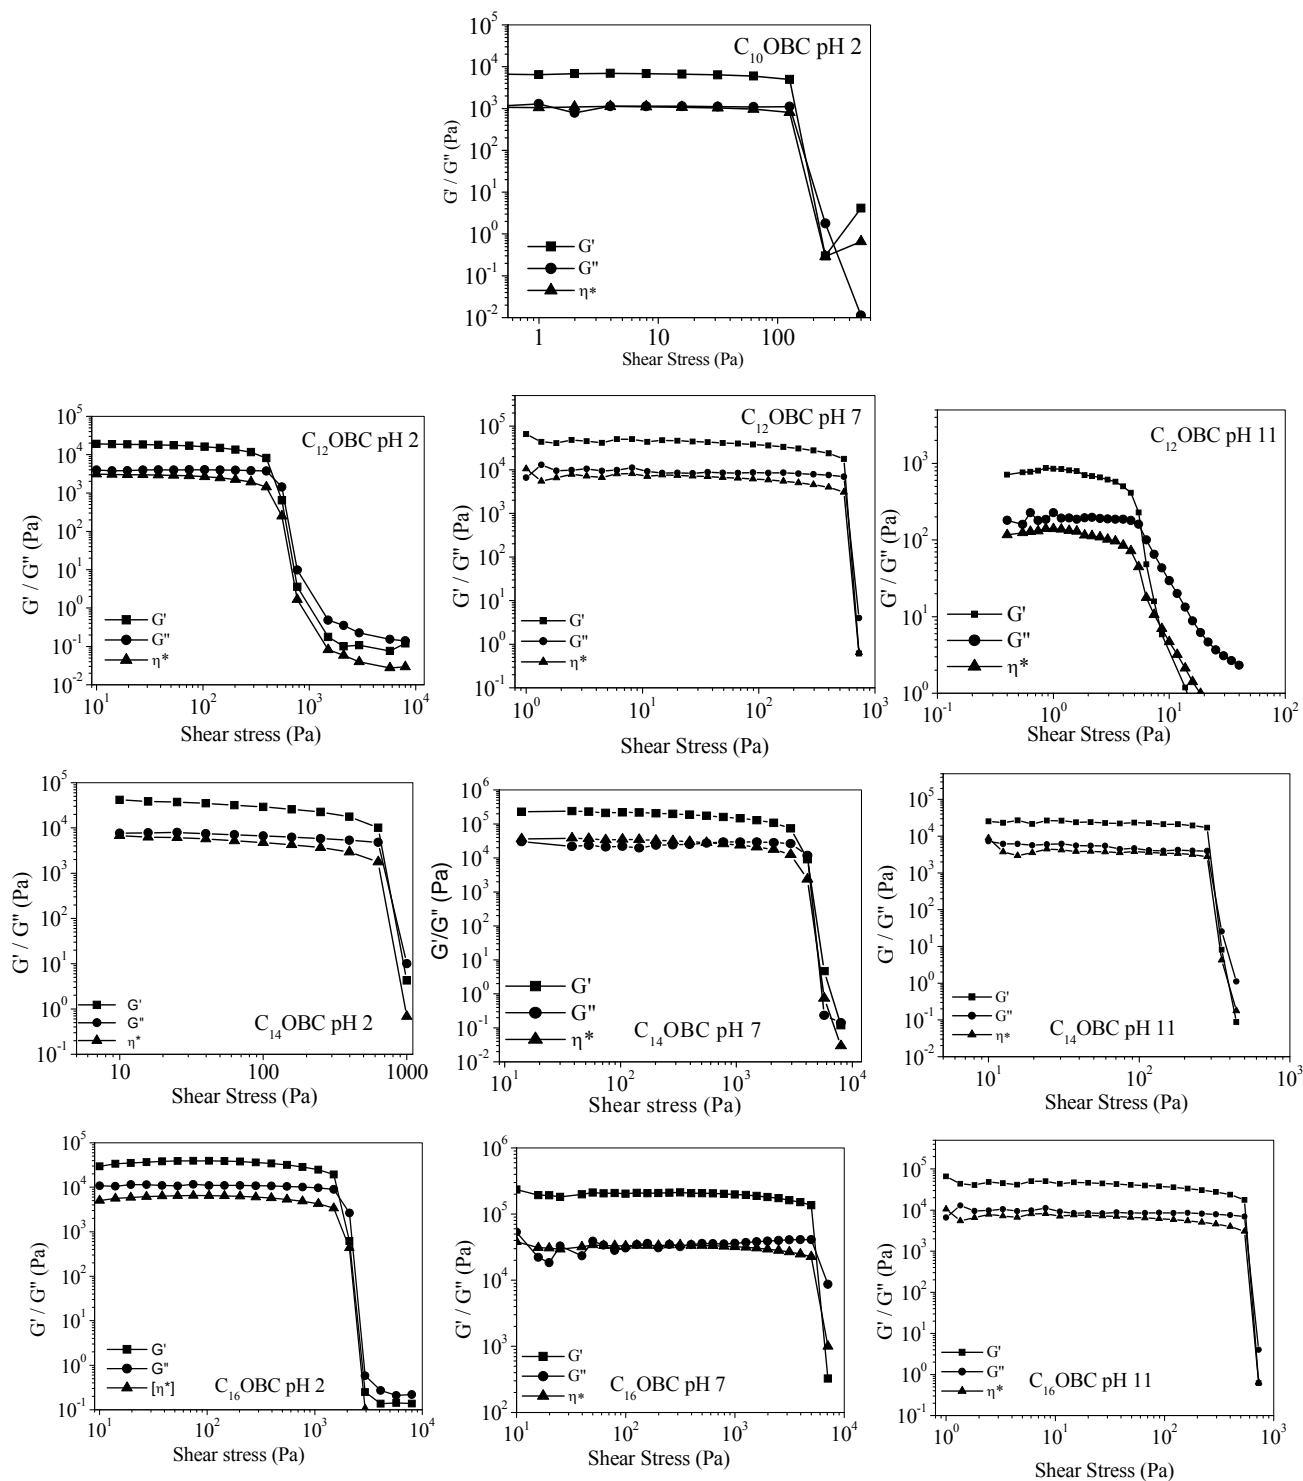

**Figure S3.** Plot of  $G' / G''$  Vs amplitude of  $C_n$ OBC gels in 20 mM phosphate buffer of pH 2, pH 7 and pH 11.
